# Supplementary material for: Amyloid-β Induces Hepatic Insulin Resistance In Vivo via JAK2
Source: PubMed Central journal article supplement — Diabetes. 2013 Mar 14;62(4):1159–66. doi: 10.2337/db12-0670 (PMC3609589; doi:10.2337/db12-0670), 2013-03-14

SUPPLEMENTARY DATA

**Supplementary Figure 1.** Intraperitoneal injection of high-dose A $\beta$ 42 has no significant effect on body weight, food intake and liver function in C57BL/6J mice. *A*: Body weight of 10-week-old male C57BL/6J mice injected with PBS or high-dose A $\beta$ 42 (50  $\mu$ g/mice, twice a day) for 9 days (n = 12 for each group) and 19 days (n = 11-12 for each group). *B*: Food intake of 10-week-old male C57BL/6J mice injected with PBS or high-dose A $\beta$ 42 (n = 11-12 for each group). *C*: Plasma alanine transaminase (ALT) and aspartate transaminase (AST) activity in the male C57BL/6J mice injected with PBS or high-dose A $\beta$ 42 (n = 6 for each group). A $\beta$ 42(H), high-dose A $\beta$ 42. Data are presented as mean and s.d.

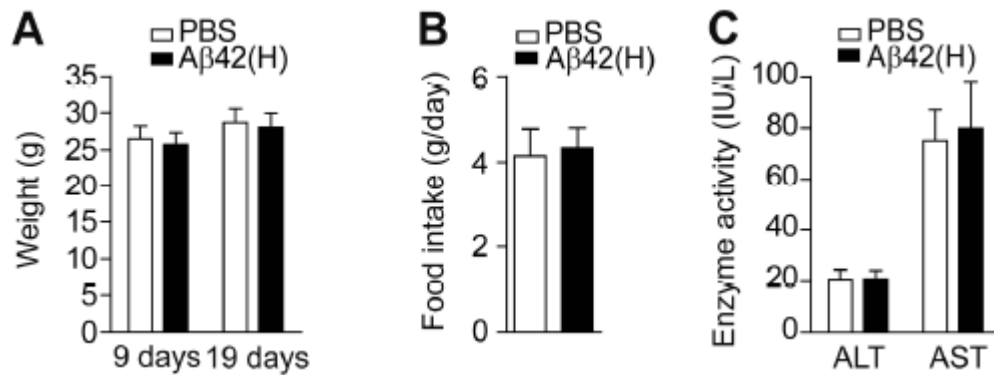

SUPPLEMENTARY DATA

**Supplementary Figure 2.** Intraperitoneal injection of high-dose A $\beta$ (42-1) has no significant effect on fasting blood glucose level, insulin sensitivity, body weight, food intake and liver function in C57BL/6J mice. *A:* Fasting blood glucose levels of 10-week-old C57BL/6J mice injected with PBS or high-dose A $\beta$ (42-1) (50  $\mu$ g/mice, twice a day) for 9 days (n = 9-10 for each group). Fasting blood glucose levels were measured in mice fasted overnight for 14 h. *B:* Insulin tolerance test of 10-week-old C57BL/6J mice injected with PBS or high-dose A $\beta$ (42-1) for 19 days (n = 9-10 for each group). *C:* Area under the curve (AUC) of insulin tolerance tests in B. *D:* Body weight of 10-week-old male C57BL/6J mice injected with PBS or high-dose A $\beta$ (42-1) for 9 and 19 days (n = 9-10 for each group). *E:* Food intake of 10-week-old male C57BL/6J mice injected with PBS or high-dose A $\beta$ (42-1) (n = 9-10 for each group). *F:* Plasma alanine transaminase (ALT) and aspartate transaminase (AST) activity in the male C57BL/6J mice injected with PBS or high-dose A $\beta$ (42-1) (n = 3-4 for each group). Data are presented as mean and s.d.

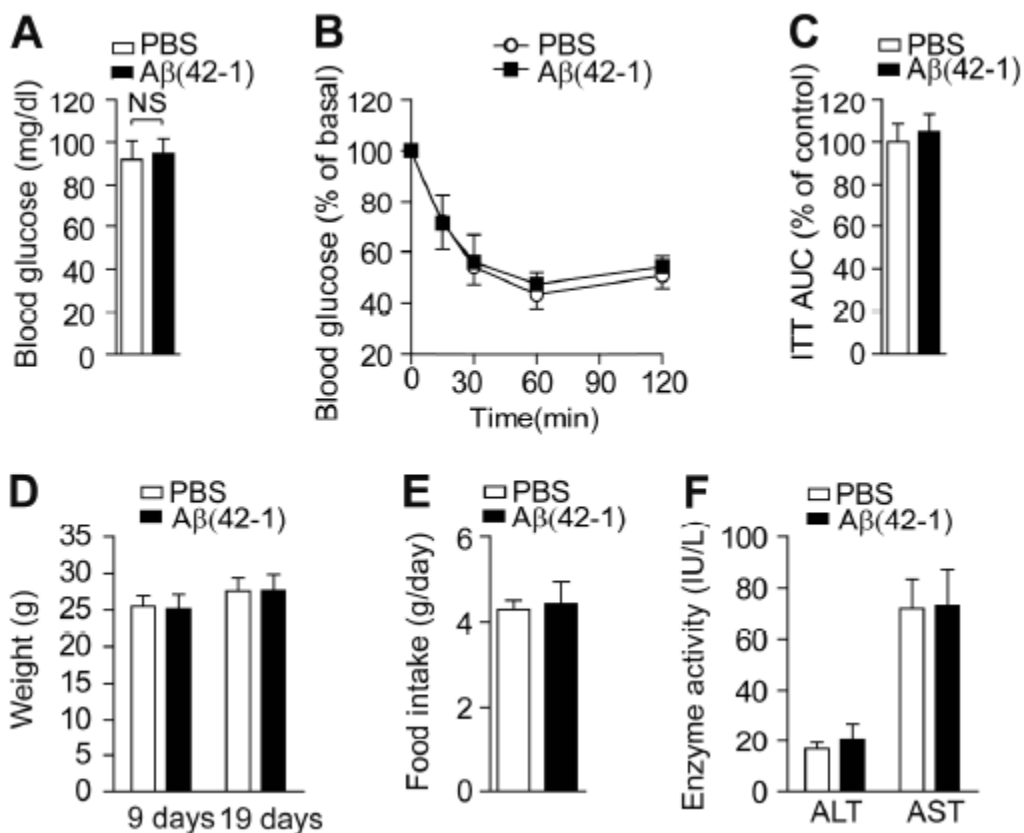

SUPPLEMENTARY DATA

**Supplementary Figure 3.** Intraperitoneal injection of low-dose A $\beta$ 42 has no significant effect on body weight, food intake and liver function in C57BL/6J mice. *A*: Body weight of 10-week-old male C57BL/6J mice injected with PBS or low-dose A $\beta$ 42 (12.5  $\mu$ g/mice, twice a day) for 17 and 25 days (n = 12 for each group). *B*: Food intake of 10-week-old male C57BL/6J mice injected with PBS or low-dose A $\beta$ 42 (n = 12 for each group). *C*: Plasma alanine transaminase (ALT) and aspartate transaminase (AST) activity in the male C57BL/6J mice injected with PBS or low-dose A $\beta$ 42 (n = 6 for each group). A $\beta$ 42(L), low-dose A $\beta$ 42. Data are presented as mean and s.d.

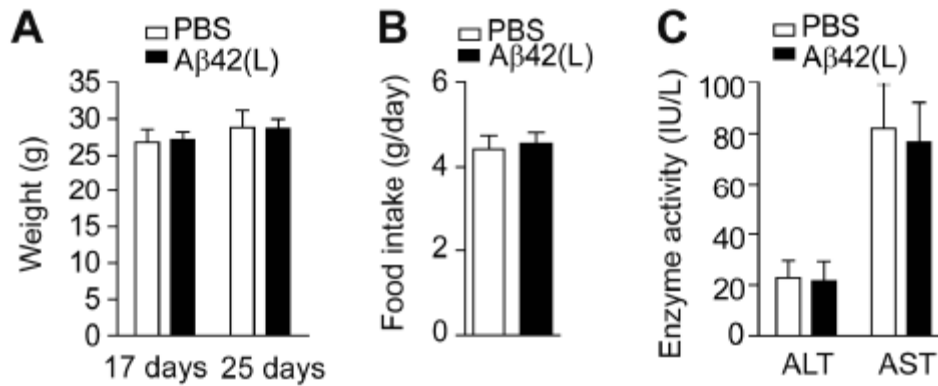

SUPPLEMENTARY DATA

**Supplementary Figure 4.** Intraperitoneal injection of low-dose A $\beta$ (42-1) has no significant effect on fasting blood glucose level, insulin sensitivity, body weight, food intake and liver function in C57BL/6J mice. *A:* Fasting blood glucose levels of 10-week-old C57BL/6J mice injected with PBS or low-dose A $\beta$ (42-1) (12.5  $\mu$ g/mice, twice a day) for 17 days (n = 12 for each group). Fasting blood glucose levels were measured in mice fasted overnight for 14 h. *B:* Insulin tolerance test of 10-week-old C57BL/6J mice injected with PBS or low-dose A $\beta$ (42-1) for 25 days (n = 11-12 for each group). *C:* AUC of insulin tolerance tests in B. *D:* Body weight of 10-week-old male C57BL/6J mice injected with PBS or low-dose A $\beta$ (42-1) for 17 and 25 days (n = 11-12 for each group). *E:* Food intake of 10-week-old male C57BL/6J mice injected with PBS or low-dose A $\beta$ (42-1) (n = 12 for each group). *F:* Plasma alanine transaminase (ALT) and aspartate transaminase (AST) activity in the male C57BL/6J mice injected with PBS or low-dose A $\beta$ (42-1) (n = 6 for each group). Data are presented as mean and s.d.

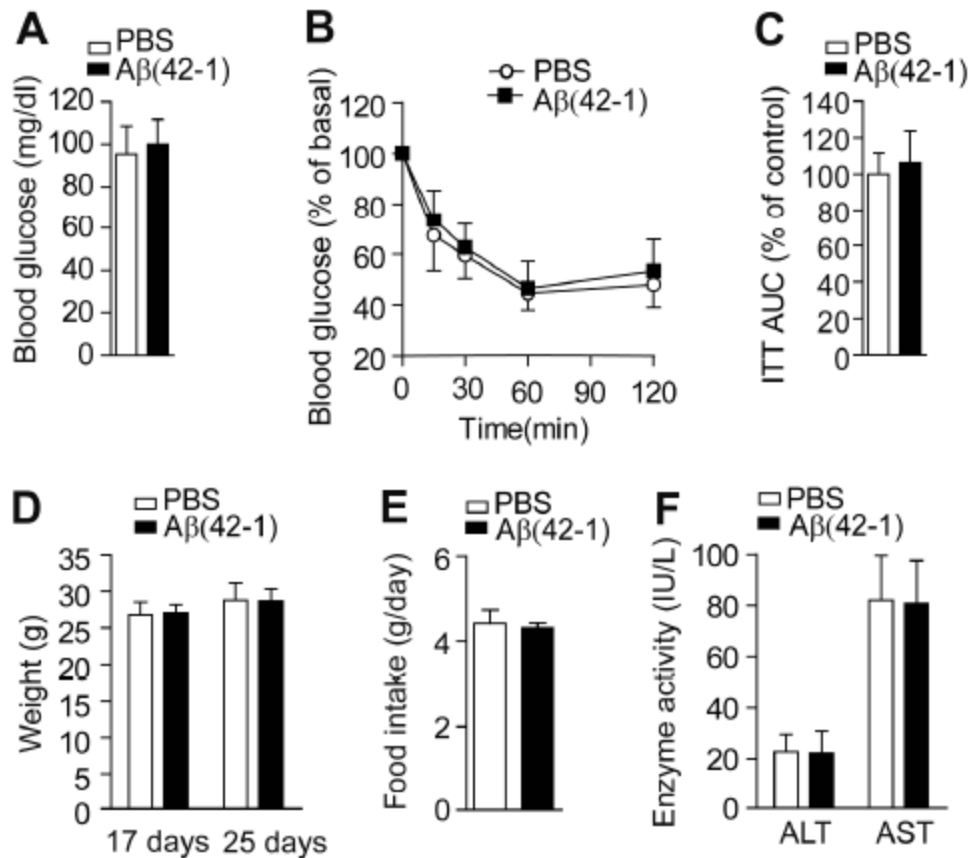

SUPPLEMENTARY DATA

**Supplementary Figure 5.** Injection of neutralizing antibody against A $\beta$  for 1 week has no significant effect on fasting blood glucose level and hepatic JAK2/STAT3/SOCS1 signaling in APP/PS1 AD model mice. **A:** Fasting blood glucose levels of APP/PS1 mice intraperitoneally injected once with control IgG, 1H3 or 6C8 anti-A $\beta$  neutralizing antibody for 1 week (n = 4-5 for each group). The fasting blood glucose levels were measured after fasting for 4 h. **B:** Immunoblot analysis of liver JAK2 and STAT3 phosphorylation states and SOCS-1 protein levels in APP/PS1 mice injected once with control IgG, 1H3 or 6C8 anti-A $\beta$  neutralizing antibody for 1 week. **C:** Quantification of phosphorylated JAK2 and STAT3 levels and SOCS-1 protein levels in (B). All the protein levels were normalized to tubulin. Data are presented as mean and s.d.

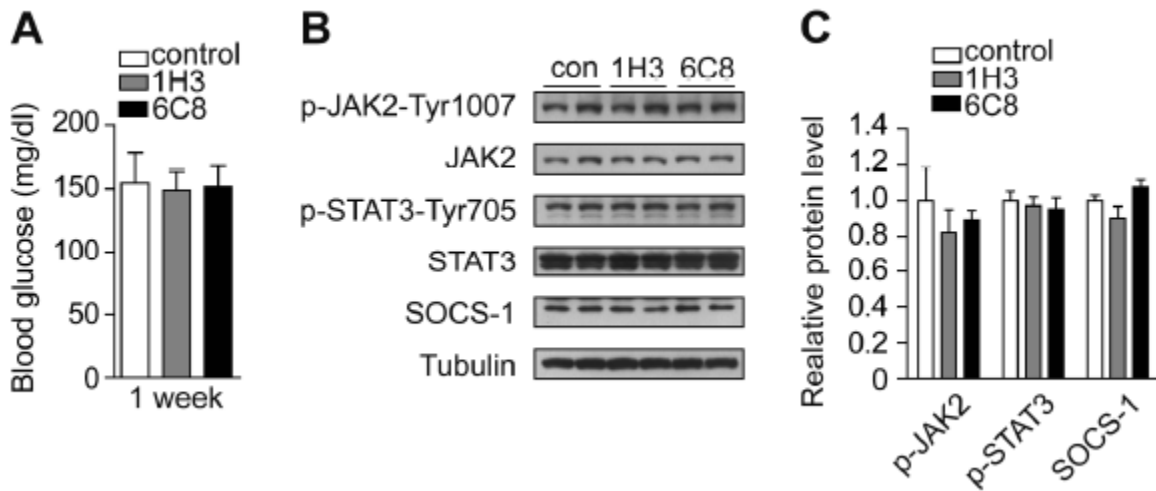

Supplement: supp_db12-0670_DB120670SupplementaryData.pdf [file supp_db12-0670_DB120670SupplementaryData.pdf]
